# Supplementary material for: Malignancy in giant cell tumor of bone: analysis of an open-label phase 2 study of denosumab
Source: PubMed Central journal article supplement (PMC7824947; doi:10.1186/s12885-020-07739-8), 2021-01-22
Supplement: 12885_2020_7739_MOESM1_ESM.pdf [file 12885_2020_7739_MOESM1_ESM.pdf]

## **Supplementary Information**

### **Malignancy in Giant Cell Tumor of Bone: Analysis of an Open-Label Phase 2 Study of Denosumab**

Emanuela Palmerini, MD, PhD, Leanne L Seeger, MD, Marco Gambarotti, MD,  
Alberto Righi, MD, Peter Reichardt, MD, Susan Bukata, MD, Jean-Yves Blay, MD,  
Tian Dai, PhD, Danielle Jandial, MD, Piero Picci, MD

## Additional file 1: List of Independent Ethics Committees (IECs)

**Table S1. List of IECs**

| Investigator                     | Site name                                                                      | Location                               | IEC name                                                                |
|----------------------------------|--------------------------------------------------------------------------------|----------------------------------------|-------------------------------------------------------------------------|
| Chawla, Sant                     | Sarcoma Oncology Center                                                        | Santa Monica CA, USA                   | Sarcoma Oncology Center Ethics Committee                                |
| Skubitz, Keith                   | University of Minnesota                                                        | Minneapolis MN, USA                    | University of Minnesota, Institutional Review Board                     |
| Schuetze, Scott                  | Michigan Medicine: University of Michigan                                      | Ann Arbor, MI, USA                     | University of Michigan Hospital and Health Centers Ethics Committee     |
| Hartner, Lee                     | Pennsylvania Hospital                                                          | Philadelphia, PA, USA                  | Hospital of the University of Pennsylvania Ethics Committee             |
| Choy, Edwin                      | Massachusetts General Hospital                                                 | Boston, MA, USA                        | Executive Committee on Research                                         |
| Henshaw, Robert                  | MedStar Washington Hospital Center                                             | Washington DC, USA                     | Medstar Health Research Institute Institutional Review Board            |
| Malamud, Stephen                 | Mount Sinai Health System                                                      | New York, NY, USA                      | Mount Sinai Ethics Committee                                            |
| Scarborough, Mark                | University of Florida, College of Medicine                                     | Gainesville, FL, USA                   | University of Florida, Institutional Review Board                       |
| Bryant, Nichole                  | Prisma Health Greenville Memorial Hospital                                     | Greenville, SC, USA                    | University of South Carolina, School of Medicine, Ethics Committee      |
| Ganjoo, Kristen                  | Stanford Health Care, Stanford University Medical Center                       | Stanford, CA, USA                      | Stanford Center for Biomedical Ethics                                   |
| Casali, Paolo                    | Istituto Nazionale Tumori                                                      | Milano, Italy                          | INT Ethics Committee                                                    |
| Ferrari, Stefano                 | Istituto Ortopedico Rizzoli                                                    | Bologna, Italy                         | Central Emilia Wide Area Ethical Committee of the Emilia-Romagna Region |
| Blay, Jean Yves                  | Leon Berard Center                                                             | Lyon cedex 8, France                   | IARC Ethics Committee                                                   |
| Duffaud, Florence                | Aix Marseille Université                                                       | Marseille cedex 05, France             | Aix Marseille Université Ethics Committee                               |
| Le Cesne, Axel                   | Institut de Cancerologie Gustave-Roussy                                        | Villejuif cedex, France                | Department for Sponsorship of Clinical Studies                          |
| Hamilton, Anne                   | Peter MacCallum Cancer Centre                                                  | East Melbourne, Victoria, Australia    | Human Research Ethics & Governance: Peter Mac Ethics Committee          |
| Powell, Alex                     | Hollywood Private Hospital                                                     | Nedlands, Western Australia, Australia | Hollywood Private Hospital Research Ethics Committee                    |
| Stalley, Paul                    | The University of Sydney                                                       | Camperdown, New South Wales, Australia | Human Research Ethics Committee                                         |
| Rutkowski, Piotr                 | Maria Sklodowska-Curie Memorial Cancer Center and Institute of Oncology (MSCI) | Warszawa, Poland                       | MSCI Ethics Committee                                                   |
| Rychlowska-Pruszyńska, Magdalena | Institute of Mother and Child                                                  | Warszawa, Poland                       | Institute of Mother and Child Bioethics Committee                       |

| <b>Investigator</b>  | <b>Site name</b>                                                       | <b>Location</b>                   | <b>IEC name</b>                                                        |
|----------------------|------------------------------------------------------------------------|-----------------------------------|------------------------------------------------------------------------|
| Pink, Daniel         | Klinik für Hämatologie/Onkologie und Palliativmedizin, HELIOS Klinikum | Bad Saarow, Germany               | Ethik-Kommission der Landesärztekammer Brandenburg                     |
| Gelderblom, Andre    | Leiden University Medical Center                                       | Leiden, Netherlands               | ICLON Research Ethics Committee                                        |
| Parry, Michael       | Royal Orthopaedic Hospital                                             | Birmingham, UK                    | Research Ethics Committee                                              |
| Luna, Pablo          | Hospital Son Espases                                                   | Palma de Mallorca, Balears, Spain | Hospital Research Committee and the Institutional Ethical Review Board |
| Lopez Pousa, Antonio | Hospital de la Santa Creu i Sant Pau                                   | Barcelona, Cataluña, Spain        | Ethics Committee for research with medicinal products (CEIm)           |
| Razak, Albiruni      | Mount Sinai Hospital                                                   | Toronto, Ontario, Canada          | Mount Sinai Hospital Research Ethics Board                             |
| Alcindor, Thierry    | McGill University                                                      | Montreal, Quebec, Canada          | Research Ethics Board                                                  |
| Engellau, Jacob      | Lund University Hospital                                               | Lund, Sweden                      | Swedish Ethical Review Authority                                       |
| Funovics, Philipp    | Medical University of Vienna                                           | Wien, Austria                     | Ethics Committee of the Medical University of Vienna                   |

## **Additional file 2: Supplementary Methods**

### **Immunohistochemistry**

The tissue was fixed in 4% buffered formalin, routinely processed and embedded in paraffin; 4 µm-thick tissue sections were cut, heated at 58°C for 2 hours, deparaffinized and immunostained on a Ventana BenchMark following the manufacturer's guidelines (Ventana Medical Systems, Tucson AZ, USA or Dako Autostainer Plus, Dako Glostrup, Denmark). The reaction was revealed with iVIEW DAB detection kit, providing a brown reaction product. Table S2 shows antibody source, dilution and antigen retrieval protocol. Pretreatment for antigen retrieval was performed at 95°C with Tris-EDTA pH 8 for 20 minutes. Appropriate positive and negative controls were included in each run.

### **Fluorescence in situ hybridization (FISH)**

FISH was performed using the SPEC MDM2/CEN 12 Dual Color Probe (ZytoVision GmbH, Bremerhaven, Germany) according to the manufacturer's protocol. Tissue sections of 4 µm were dewaxed in xylene and treated with an ethanol-to-water series. Sections were incubated in TRIS 5 mM-EDTA 1 mM solution at 95°C for 15 minutes, rinse in distilled water and treated with pepsin solution (0.04% in 0.01N HCl) at 37°C for 15 minutes. The MDM2-probe was applied to the target area and the slides were coverslipped and sealed with rubber cement. The samples and probe were co-denatured in Dako Hybridizer (Dako, Glostrup, Denmark) at 85°C for 1 minute and incubated overnight at 37°C. Cases were scored by counting a minimum of 100 tumor cell nuclei at 100X magnification with a DAPI/green/red triple band pass filter. The number of MDM2 and CEP12 signals was determined and a MDM2/CEP12 ratio was calculated for each nucleus. A ratio >2.0 in at least 10% of nuclei was considered amplified for the MDM2 gene.

### Additional file 3: Table S2

#### Source of Dilution and Antigen Retrieval of the Antibodies Used

| Antibodies          | Clone         | Source                     | Dilution/Antigen retrieval |
|---------------------|---------------|----------------------------|----------------------------|
| CK AE1/AE3          | AE1/AE3/PCK26 | monoclonal antibody        | Prediluted/Ventana         |
| Smooth muscle actin | 1A4           | monoclonal antibody        | Prediluted/Ventana         |
| Desmin              | DE-R-11       | monoclonal antibody        | Prediluted/Ventana         |
| Myogenin            | EP162         | monoclonal antibody        | Pre-diluted/Ventana        |
| S100                | 4C4.9         | monoclonal antibody        | Pre-diluted/Ventana        |
| CD31                | JC70          | monoclonal antibody        | Pre-diluted/Ventana        |
| MDM2                | IF2           | mouse monoclonal antibody  | 1:50/ Invitrogen           |
| CD34                | QBEnd-10      | monoclonal antibody        | pre-diluted/Ventana        |
| SATB2               | SATBA4B10     | mouse monoclonal antibody  | 1:200/ Abcam               |
| H3F3A (G34W)        | RM263         | rabbit monoclonal antibody | 1:600/Histoline            |
| P53                 | DO-7          | monoclonal antibody        | Pre-diluted/Ventana        |
| P63                 | 4A4           | mouse monoclonal antibody  | Prediluted/Ventana         |
| Ki67                | 30/9          | monoclonal antibody        | Pre-diluted/Ventana        |
